# 1 Amino acid and nucleotide metabolism 2 shape the selection of trophic levels in 3 animals

4 **Rosemary Yu<sup>1,2</sup>, Hao Wang<sup>1,3</sup>, Jens Nielsen<sup>1,2,4,5,\*</sup>**

5 <sup>1</sup> Department of Biology and Biological Engineering, Chalmers University of Technology, SE-412 96  
6 Gothenburg, Sweden.

7 <sup>2</sup> Novo Nordisk Foundation Center for Biosustainability, Chalmers University of Technology, SE-412  
8 96 Gothenburg, Sweden.

9 <sup>3</sup> National Bioinformatics Infrastructure Sweden, Science for Life Laboratory, Chalmers University of  
10 Technology, SE-412 58, Gothenburg, Sweden.

11 <sup>4</sup> Novo Nordisk Foundation Center for Biosustainability, Technical University of Denmark, DK-2800  
12 Kgs. Lyngby, Denmark.

13 <sup>5</sup> BioInnovation Institute, Ole Måløes Vej 3, DK-2200 Copenhagen N, Denmark.

14

15 **\* Corresponding author:**

16 Jens Nielsen, [nielsenj@chalmers.se](mailto:nielsenj@chalmers.se)

17

18

## 19 Abstract

20 What an animal eats determines its trophic level (TL) in the food web. The diet of high-TL animals is  
21 thought to contain more energy because it contains higher levels of lipids. This however has not been  
22 systematically examined in the context of comprehensive metabolic networks of different animals.  
23 Here, we reconstruct species-specific genome-scale metabolic models (GEMs) of 32 animals, and  
24 calculate the maximum ATP production per unit of food for each animal. Surprisingly, we find that  
25 ATP production is closely associated with metabolic flux through central carbon metabolism and  
26 amino acid metabolism, while correlation with lipid metabolism is low. Further, metabolism of  
27 specific amino acids and nucleotides underlie maximum ATP production from food. Our analyses  
28 indicate that amino acid and nucleotide metabolism, rather than lipid metabolism, are major  
29 contributors to the selection of animal trophic levels, demonstrating that species-level metabolic flux  
30 plays key roles in trophic interactions and evolution.

## 31 Introduction

32 The choice of food used by an organism for nutritional intake, and the breakdown of nutrients to  
33 generate energy in the form of adenosine triphosphate (ATP), are fundamental to living systems.  
34 Animals exhibit a wide diversity of dietary choices which place them at different trophic levels (TL) in  
35 a food chain or food web (Fig 1A). In terms of food availability, plants and algae/phytoplankton are  
36 exceptionally abundant and stable dietary resources, and have been so across evolutionary history <sup>1-</sup>  
37 <sup>3</sup>. Moreover, a plant-based diet is estimated to be >10-fold more ecologically efficient than an  
38 animal-based diet, since only a fraction of the energy available in the biomass of a given TL is  
39 transferred to the next upper TL <sup>4-7</sup>. Consistently, the evolutionary diversification rate of herbivores  
40 has been found to be faster than that of carnivores <sup>8</sup>, while specialization in carnivory appears to be  
41 unstable, as it is associated with short extinction times and repeated ecological replacements <sup>9,10</sup>.  
42 Surprisingly, however, recent large-scale studies have shown that a relatively small proportion of  
43 animal species are herbivores (32-43%), whereas 57-66% of species have a diet consisting, partially or  
44 completely, of other animals <sup>8,11</sup>. This suggests a selective advantage in an animal-based diet, which  
45 thereby favors the selection of high-TL animals.

46 The traditional assumption (e.g. ref <sup>12</sup>) for this selection pressure is that an animal-based diet  
47 contains more lipids, whereas a plant-based diet contains less lipids but more carbohydrates (Fig 1B-  
48 C). As the energy density of lipids is higher than carbohydrates <sup>13,14</sup>, this suggests that high-TL animals  
49 would be able to extract more energy per unit of food, consistent with the observation that  
50 carnivores spend less time feeding than similar-sized herbivores <sup>15</sup>. In other words, dietary lipid to  
51 carbohydrate ratio is thought to be the main determinant of the amount of energy obtained by an  
52 organism per unit of food. However, in living systems energy is extracted as ATP through a complex  
53 network of metabolic reactions, and the bottleneck(s) of ATP production in the context of the  
54 metabolic network of different animals is unknown. Moreover, there is substantial differences in  
55 dietary protein content with respect to TL (Fig 1B-C), which has an energy density comparable to that  
56 of carbohydrates, which can further contribute to ATP production. A closer examination of the  
57 metabolic determinants in trophic selection is therefore warranted.

58 A genome-scale metabolic model (GEM) is a constraint-based modeling framework wherein the  
59 metabolic network of an organism is represented mathematically <sup>16,17</sup>. Simulations using GEMs are  
60 based on the concept of flux balance analysis (FBA) <sup>16</sup>, and can be used to calculate the production  
61 level of a metabolite with given constraints in the intake of nutrients. GEMs for microorganisms have  
62 been used for such simulations for many years <sup>18,19</sup>, and recently a unified Human-GEM, containing

63 8,378 metabolites and 13,072 reactions, has also been published <sup>20</sup>, following >15 years of a  
64 concerted community effort.

65 Here, by using Human-GEM as a template <sup>20</sup>, we report the reconstruction of GEMs for 32 animals  
66 and their use for performing FBA simulations at a range of TLs. Imposing constraints on these GEMs  
67 based on the dietary composition of carbohydrates, lipids, and proteins allows the simulation of ATP  
68 production per unit of food in each species. Interestingly, simulation results show that ATP  
69 production in relation to TL is associated with dietary protein content, rather than dietary lipid  
70 content. We further show that TL is substantially correlated with metabolic flux through most  
71 reactions in central carbon metabolism and amino acid metabolism (in particular Lys, Trp, Tyr, Ile,  
72 Leu, and Val), but only a small proportion of reactions in lipid metabolism. Finally, we find that  
73 metabolic pathways of specific amino acids (His metabolism, Thr-Gly conversion, and Asn-Asp  
74 conversion) and nucleotides underlie maximum ATP production from food. Taken together, our  
75 analyses indicate that amino acid and nucleotide metabolism play major roles in shaping the  
76 metabolism of high-TL animals, and suggest that species-level metabolic flux can play key roles in  
77 trophic interactions and evolution.

## 78 Results

### 79 Dietary nutrient composition

80 We reconstructed species-specific animal GEMs for a total of 32 species, including 22 terrestrial and  
81 11 aquatic organisms, with TL ranging from 2 to 4.2 (Supplementary Table 1; see Methods section for  
82 data source and related calculations). To constrain the models based on dietary nutrient  
83 composition, we calculated the % (g/g wet weight) of dietary carbohydrates, lipids, and proteins for  
84 each species (Supplementary Table 1), based on attributes mined from EltonTraits <sup>21</sup> and FishBase <sup>22</sup>  
85 (see Methods section). Consistent with previous literature, dietary carbohydrate content decreases  
86 with TL (Fig 2A). At around TL = 2, the dietary carbohydrate content varies between 2-8%, as there  
87 are large differences in the carbohydrate content in different parts of plants (Fig 1B-C). The diet of  
88 the herbivorous (TL = 2.05) fish *Oreochromis niloticus* (Nile tilapia) contains 11% carbohydrates,  
89 reflecting the high carbohydrate content in algae <sup>23</sup>. Above around TL = 3, dietary carbohydrates of  
90 both terrestrial and aquatic species decreased below 1% (Fig 2A). In contrast, the dietary content of  
91 proteins increases with TL, from 2% to 19%, and data from both terrestrial and aquatic species follow  
92 closely the same trajectory (Fig 2B). The dietary content of lipids also increases with TL, however data  
93 from terrestrial and aquatic species clearly follow distinct trajectories, with terrestrial species  
94 reaching up to 10% dietary lipids at high TL, while aquatic species reaching only 4% (Fig 2C). The diet

95 of *Oreochromis niloticus* contains 6% lipids, again reflecting the biomass composition of algae<sup>23</sup>,  
96 which places the dietary lipid content of this fish in the trajectory of terrestrial animals (Fig 2C).

### 97 ATP production is not associated with dietary lipid content

98 We used FBA to simulate the maximum ATP production for each species, given the constraints in  
99 dietary carbohydrates, proteins, and lipids. The reactions of O<sub>2</sub> uptake, CO<sub>2</sub> production, as well as  
100 exchange reactions of H<sub>2</sub>O, protons, and metal ions, were unconstrained. For nitrogenous waste, the  
101 exchange reactions of urea, urate, allantoin, or NH<sub>3</sub>, were either unconstrained or constrained to 0,  
102 to reflect the species-specific waste product (see Methods section). All other exchange reactions  
103 were constrained to 0. We found that ATP production increased with increasing TL (Fig 2D), and  
104 importantly, it is not grouped into distinct trajectories depending on the habitat of the animals, as is  
105 the case with dietary lipid content (Fig 2C). This indicates that, contrary to the traditional assumption  
106<sup>12</sup>, lipid content is not the limiting dietary nutrient in ATP production in relation to TL.

107 To further examine the metabolic constraints of ATP production from the diet in different animals,  
108 we constrained the ATP production reaction in each GEM to the maximum calculated value (Fig 2D),  
109 and implemented FBA with random sampling<sup>24</sup> to obtain a set of 1,000 possible flux distributions  
110 within the feasible region. The average flux of each reaction (Supplementary Table 2) was then  
111 correlated with TL, and hereby we found that a large proportion of reactions in metabolic  
112 subsystems related to central carbon metabolism and amino acid metabolism are highly correlated  
113 with TL (Fig 2E). In contrast, the pathways related to lipid metabolism have relatively few reactions  
114 correlating with TL (Fig 2E), in agreement with the result that ATP production is not constrained by  
115 the dietary lipid content of animals at different TLs.

### 116 Metabolic fluxes correlated with TL

117 We then examined the specific reactions and pathways that are found to be highly correlated with  
118 TL. In the glycolysis-gluconeogenesis pathway, almost all reactions in 'lower' glycolysis, involving a  
119 chain of metabolic conversions between 3-carbon molecules, are highly correlated with TL (Fig 3A);  
120 whereas reactions in 'upper' glycolysis, involving the metabolism of 6-carbon molecules, are not. The  
121 reaction that connects upper and lower glycolysis (HMR\_4375r), which converts the 6-carbon  
122 molecule fructose 1,6-bisphosphate (F1,6-bP) to 3-carbon molecules dehydroxyacetone phosphate  
123 (DHAP) and glyceraldehyde 3-phosphate (G3P), shows borderline correlation with TL with  $\rho_{\text{Spearman}} =$   
124 0.75 (Fig 3A). In particular, lower glycolysis generally carries positive flux in low-TL species, consistent  
125 with the use of glycolysis to metabolize the high levels of carbohydrates in the diet of these  
126 organisms (Fig 2A). In high-TL species, this pathway carries negative flux (Fig 3A), indicating the use of  
127 gluconeogenesis to synthesize other metabolic intermediates, at a cost of ATP.

128 In the tricarboxylic acid (TCA) cycle, we found that the first step of the pathway (HMR\_4145r)  
129 catalyzing the entry of acetyl-CoA into the cycle, as well as several steps in the second half of the  
130 cycle converting succinyl-CoA (Suc-CoA) to malate (MAL), are highly correlated with TL (Fig 3B). This  
131 is likely related to high levels of acetyl-CoA and Suc-CoA entering the TCA cycle in high-TL species. As  
132 the high dietary protein levels (Fig 2B) provides disproportionate levels of amino acids, many of the  
133 amino acids are deaminated and converted into acetyl-CoA or succinyl-CoA, entering the TCA cycle to  
134 generate ATP. As an example, Fig 3C shows the degradation of lysine to acetyl-CoA, wherein several  
135 steps are highly correlated with TL. The degradation of aromatic amino acids to acetyl-CoA, and  
136 branched chain amino acids to succinyl-CoA, all follow similar trends (Supplementary Table 2).

### 137 ATP production is constrained by nucleotide metabolism

138 In amino acid metabolic pathways, beyond the increase in the degradation of amino acids to acetyl-  
139 CoA and Suc-CoA within increasing TL (Fig 3B-C and Supplementary Table 2), we also found that TL is  
140 highly correlated with several amino acids being shunted towards the synthesis of metabolic  
141 intermediates in nucleotide synthesis. In particular, nearly all steps in the conversion of histidine to  
142 10-formyl THF, which enters the nucleotide metabolic pathway at two distinct steps, are highly  
143 correlated with TL, with an overall  $\rho_{\text{Spearman}} = 0.96$  (Fig 4A). The conversion of threonine to glycine,  
144 and asparagine to aspartate, are similarly highly correlated with TL ( $\rho_{\text{Spearman}} = 0.94$  and  $0.85$   
145 respectively), consistent with an increased supply of GAR (Glycineamideribotide) and SAICAR  
146 (Phosphoribosylaminoimidazolesuccinocarboxamide) to the nucleotide metabolic pathway (Fig 4A).  
147 Moreover, reactions in the entire pathway of IMP (inosine monophosphate) production from PRPP  
148 (phosphoribosyl pyrophosphate), all exhibit high correlations with TL ( $\rho_{\text{Spearman}} = 0.96$ ), suggesting  
149 that nucleotide metabolism, rather than the lipid metabolism, plays a significant role in ATP  
150 production in animals at different TLs.

151 While it makes intuitive sense that ATP production is constrained by the metabolic pathway  
152 catalyzing the synthesis of nucleotides, these results do not account for any nucleotides that are  
153 already available as a part of the diet (free or bound in DNA/RNA). As measurements of nucleotide  
154 content in different dietary sources are scarce, we addressed this by constraining our model to allow  
155 a dietary AMP intake of up to 10% (g/g wet weight). We then used GEMs to simulate the maximum  
156 ATP production in each species as before. Our results show that allowing for up to 10% of dietary  
157 AMP led to an up-shift in the maximum ATP production in each species by  $\sim 29$  mmol, but did not  
158 alter the overall trajectory of ATP production with respect to TL (Fig 4B). Data from terrestrial and  
159 aquatic species remained on the same trajectory, instead of separating into distinct groups which  
160 would be the case if dietary lipids were the constraining nutrient for ATP production (Fig 2C). We

161 therefore conclude that amino acid and nucleotide metabolism play key roles in the production of  
162 ATP from food, which in turn contributes to the evolutionary selection of animals at high TL.

## 163 Discussion

164 We reconstructed species-specific GEMs for 32 different animals and simulated the maximum ATP  
165 production per unit of food. Our analyses show that dietary protein content, rather than dietary lipid  
166 content, supports an increased ATP production that correlates with increasing TL. Results further  
167 indicate that ATP production from food is limited by the metabolic pathways of histidine metabolism,  
168 threonine-glycine conversion, asparagine-aspartate conversion, and nucleotide metabolism. We  
169 therefore conclude that amino acid and nucleotide metabolism are major contributors to the  
170 evolutionary selection of animal-based diets and high-TL animals, contrary to the traditional  
171 assumption<sup>12</sup> of lipid content being the primary selection pressure.

172 Despite the prevalent use of dietary lipid content to explain the selection of high-TL animals, this  
173 does not always fit existing data. For instance, while animal-based diets are generally thought to  
174 contain higher levels of both proteins and lipids compared to plant-based diets, this is only true of  
175 terrestrial environments. In aquatic environments, the lipid content of fish is known to be very low,  
176 whereas the biomass composition of algae contains higher levels of lipids<sup>23</sup> than fish<sup>22,25</sup> or aquatic  
177 invertebrates<sup>26</sup>. As such, in aquatic environments, the diet of herbivorous species actually contains  
178 more lipids than omnivorous or carnivorous species. Therefore, dietary lipid content cannot explain  
179 the selection of high-TL species in aquatic ecosystems, suggesting that alternative factors are  
180 involved. Of the three main energy-carrying macronutrients in the diet, only the protein content is  
181 higher in omnivorous/carnivorous fish than in herbivorous fish (here represented by *Oreochromis*  
182 *niloticus*, Fig 2A-C), suggesting that dietary protein content plays a key role in the selection of high-TL  
183 species, in line with our GEM simulation results.

184 Our results also show that, when a dietary nucleotide content of 10% is included as a simulation  
185 constraint upper bound, this leads to an up-shift in the maximum ATP production in all species, by an  
186 equal amount of ~29 mmol (Fig 4B). In reality, however, this up-shift is likely not constant across all  
187 species, but rather increases with increasing TL. This is because nucleotide levels generally track with  
188 protein levels, in part because the majority of RNA in living cells is ribosomal RNA which is closely  
189 associated with ribosomal proteins<sup>27</sup>. Thus, diets of high-TL animals would contain higher levels of  
190 both proteins and nucleotides, leading to a steeper slope of ATP production with respect to TL.  
191 Moreover, in low-TL animals, plant-based diets could contain toxins or anti-nutrients which limit the  
192 bioavailability of nutrients<sup>28,29</sup>. For example, trypsin inhibitors and hemagglutinins found in legumes  
193 can reduce the digestibility of proteins and amino acids by up to 50%; tannins found in cereals have

194 similar effects by up to 23%; phytates in oilseeds, by up to 10%; and many more <sup>29</sup>. These factors  
195 would further increase the steepness of the slope of ATP production with respect to TL, providing  
196 additional selection pressure for high-TL animals.

197 In addition to amino acid and nucleotide metabolism, our analyses show that metabolic flux through  
198 lower glycolysis and the second half of the TCA cycle, are also correlated with TL. Of particular note is  
199 that with increasing TL there is a reversal of the direction of flux in lower glycolysis, catalyzing  
200 glycolysis in low-TL animals, and gluconeogenesis in high-TL animals (Fig 3A). However, enzymes in  
201 this pathway are highly conserved across all organisms <sup>30,31</sup>, suggesting that the versatile use of this  
202 pathway to metabolize dietary nutrients in both directions is independent of enzyme properties and  
203 likely reflects the biochemistry of the pathway itself. Indeed, recently it has been shown that, out of  
204 hundreds of (theoretically) feasible alternative biochemical paths connecting G3P to pyruvate, the  
205 extant lower glycolysis is the optimal solution which carries the maximum flux for both glycolysis and  
206 gluconeogenesis under biologically relevant conditions <sup>32</sup>. For all other pathways found to correlate  
207 with TL, in particular the amino acid and nucleotide metabolism pathways involved in maximizing  
208 ATP production, whether adaptations in enzyme properties or pathway optimality underlies the  
209 selection of animal trophic levels remains an interesting open question.

## 210 Methods

### 211 GEM reconstruction

212 The animal GEMs were generated via an orthology-based approach, by using the RAVEN 2.0 package  
213 <sup>33</sup> and the Human-GEM version 1.7 <sup>20</sup> as a template. The annotated orthologs and paralogs associated  
214 from human to other animal species were retrieved from the Ensembl database version 103 <sup>34</sup>.

### 215 Diet type and TL calculations

216 Diets of terrestrial animals and whales (*Delphinapterus leucas* and *Physeter catodon*; see  
217 Supplementary Table 1) are obtained from EltonTraits <sup>21</sup> which contains the percent usage of 10 diet  
218 types. The diet type "Inv" (invertebrates) is further split to differentiate the usage of aquatic  
219 invertebrates or terrestrial invertebrates, based on "Food Habits" data mined from Animal Diversity  
220 Web <sup>35</sup>, to a total of 11 diet types. Diet types are mined at the genus level, to account for missing  
221 data in Animal Diversity Web. For genus with food habits of insects, terrestrial non-insect  
222 anthropoids, or terrestrial worms, terrestrial invertebrate usage is equal to Diet-Inv. For genus with  
223 food habits of aquatic or marine worms, aquatic crustaceans, echinoderms Cnidarians, other marine  
224 invertebrates, or zooplankton, aquatic invertebrate usage is equal to Diet-Inv. For the food habit of  
225 mollusks, aquatic invertebrate usage is equal to Diet-Inv only for genus with food mollusks of both



226 mollusks and fish, in order to exclude species that eat snails. If a genus is found to eat both aquatic  
227 and terrestrial invertebrates, usage of Diet-Inv is split in half into terrestrial and aquatic invertebrate  
228 usage. If no data is available, Diet-Inv is assumed to be terrestrial invertebrate usage. The  $TL_j$  of each  
229 diet type  $j$  is then taken as follows: fruit, nectar, seed, and plant,  $TL_j = 1$ ; terrestrial invertebrates,  $TL_j$   
230  $= 2$ ; vertebrate endoderms, vertebrate ectoderms, and fish,  $TL_j = 2.5$ . The  $TL_i$  of each species  $i$  is then  
231 calculated as follows <sup>36</sup>:

$$232 \quad TL_i = 1 + \sum_j (TL_j \cdot DC_{ij})$$

233 where  $DC_{ij}$  represents the fraction of  $j$  in the diet of  $i$  <sup>21</sup>.

234 For aquatic species except whales (*Delphinapterus leucas* and *Physeter catodon*),  $TL_i$  is obtained from  
235 FishBase <sup>22</sup>. The  $TL_j$  of each diet type  $j$  is taken as follows: algae,  $TL_j = 1$ ; aquatic invertebrates,  $TL_j = 2$ ;  
236 fish,  $TL_j = 3$  for species at  $TL_i$  between 3 and 4, and  $TL_j = 4$  for species at  $TL_i$  between 4 and 5. The  
237 fraction of  $j$  in the diet of  $i$  ( $DC_{ij}$ ) is then calculated as above <sup>36</sup>.

### 238 Dietary nutrient composition

239 The dietary composition of carbohydrates, lipids, and proteins for the 11 diet types (see diet type and  
240 TL calculations section) are mined from existing knowledge bases as follows: fruit <sup>26</sup>; nectar <sup>37,38</sup>;  
241 seed, <sup>26</sup>; plant, <sup>26</sup>; algae, <sup>23</sup>; aquatic invertebrates, <sup>26</sup>; terrestrial invertebrates, <sup>39,40</sup>; vertebrate  
242 endoderms, <sup>21,26</sup>; vertebrate ectoderm, <sup>26,41</sup>; vertebrate fish, <sup>22,25</sup>. Vertebrate general/unknown and  
243 scavenge are taken as the average of vertebrate endoderm, ectoderm, and fish.

### 244 FBA and random sampling

245 Constraints of each GEM are imposed as follows: for dietary carbohydrates, lipids, and proteins (CLP),  
246 both the upper bound (ub) and the lower bound (lb) of the glucose uptake reaction, lipid pool uptake  
247 reaction, and protein pool uptake reaction were constrained to the % (g/g) CLP in the diet  
248 (Supplementary Table 1), after conversion to mmol by the previously estimated molecular weight of  
249 the pool metabolites <sup>20</sup>. For  $O_2$  uptake, the ub is constrained to 0, and the lb is constrained to -Inf  
250 (negative infinity). For  $CO_2$  production, the ub is constrained to Inf, and the lb is constrained to 0.  
251 Nitrogenous waste production are as follows: Simian primates (including humans) <sup>42</sup> excrete urate  
252 and urea; non-Simian mammals excrete urea and allantoin; and fish excrete urea and  $NH_3$ . For each  
253 species, then, the allowed nitrogenous waste is constrained with ub to Inf and lb to 0. For water,  
254 proton, and metal ions (zinc, selenate, sulfate, sodium, magnesium, lithium, potassium, iodide,  
255 ferrous ion, ferric ion, cupric ion, phosphate, chloride, and calcium), ub is constrained to Inf and lb is



256 constrained to -Inf. ATP production is constrained with lb to 0 and ub to Inf. All other exchange  
257 reactions are constrained to 0.

258 MATLAB R2019b (MathWorks, Inc., Natick, MA) with Gurobi solver (Gurobi Optimizer, Beaverton,  
259 OR) in the COBRA toolbox<sup>43</sup> was used for all GEM simulations. In FBA, ATP production is set to be the  
260 objective function, and Inf (or -Inf) are converted to 1000 (or -1000) to avoid loops. In FBA with  
261 random sampling, ATP production is constrained with both lb and ub equal to the maximum ATP  
262 production calculated in the first iteration of FBA, followed by 1000 random samplings of a pair of  
263 randomly weighted objective functions, as implemented in the RAVEN toolbox<sup>33</sup>. Spearman  
264 correlation ( $\rho_{\text{Spearman}}$ ) between the mean of the 1000 random sampling results for each reaction in  
265 each species, and the TL of the species, is then calculated. Reaction flux is considered highly  
266 correlated with TL if  $\rho_{\text{Spearman}} > 0.75$  or  $\rho_{\text{Spearman}} < -0.75$ , and if the number of species where the  
267 reaction carries non-0 flux is  $> 17$  (i.e. 50% of all species considered). In subsystem analysis,  
268 subsystems wherein  $> 2$  reactions are highly correlated with TL are considered.

## 269 Data availability

270 Diet and TL data on the species studied are in Supplementary Table 1. Processed simulation results  
271 are in Supplementary Table 2. Species-specific GEMs and related data are available in the GitHub  
272 repository at <https://github.com/SysBioChalmers/GEMsforTrophicLevels>.

## 273 Code availability

274 Custom scripts are available in the GitHub repository at  
275 <https://github.com/SysBioChalmers/GEMsforTrophicLevels>.

## 276 References

- 277 1 Coates, M. I., Marcello Ruta & Friedman, M. Ever Since Owen: Changing Perspectives on the  
278 Early Evolution of Tetrapods. *Annual Review of Ecology, Evolution, and Systematics* **39**, 571-  
279 592, doi:10.1146/annurev.ecolsys.38.091206.095546 (2008).
- 280 2 Nelsen, M. P., DiMichele, W. A., Peters, S. E. & Boyce, C. K. Delayed fungal evolution did not  
281 cause the Paleozoic peak in coal production. *Proc Natl Acad Sci U S A* **113**, 2442-2447,  
282 doi:10.1073/pnas.1517943113 (2016).
- 283 3 Frederick, E. The world's first animal was probably a carnivore. *News from Science*,  
284 doi:10.1126/science.aaz3304 (2019).
- 285 4 Lindeman, R. L. The Trophic-Dynamic Aspect of Ecology. *Ecology* **23**, 399-418,  
286 doi:10.2307/1930126 (1942).
- 287 5 Kent, M. *Advanced Biology*. (OUP Oxford, 2000).
- 288 6 Spellman, F. R. *The Science of Water: Concepts and Applications, Second Edition*. (Taylor &  
289 Francis, 2000).
- 290 7 Eshel, G. & Martin, P. A. Diet, energy, and global warming. *Earth interactions* **10**, 1-17 (2006).

- 291 8 Price, S. A., Hopkins, S. S., Smith, K. K. & Roth, V. L. Tempo of trophic evolution and its impact  
292 on mammalian diversification. *Proc Natl Acad Sci U S A* **109**, 7008-7012,  
293 doi:10.1073/pnas.1117133109 (2012).
- 294 9 Van Valkenburgh, B., Wang, X. & Damuth, J. Cope's rule, hypercarnivory, and extinction in  
295 North American canids. *Science* **306**, 101-104, doi:10.1126/science.1102417 (2004).
- 296 10 Van Valkenburgh, B. Major patterns in the history of carnivorous mammals. *Annual Review of*  
297 *Earth and Planetary Sciences* **27**, 463-493 (1999).
- 298 11 Roman-Palacios, C., Scholl, J. P. & Wiens, J. J. Evolution of diet across the animal tree of life.  
299 *Evol Lett* **3**, 339-347, doi:10.1002/evl3.127 (2019).
- 300 12 Stephens, D. W. & Krebs, J. R. *Foraging Theory*. Vol. 1 (Princeton University Press, 1986).
- 301 13 Ben-Dor, M., Sirtoli, R. & Barkai, R. The evolution of the human trophic level during the  
302 Pleistocene. *Am J Phys Anthropol*, doi:10.1002/ajpa.24247 (2021).
- 303 14 Hall, K. D. *et al.* Calorie for Calorie, Dietary Fat Restriction Results in More Body Fat Loss than  
304 Carbohydrate Restriction in People with Obesity. *Cell Metab* **22**, 427-436,  
305 doi:10.1016/j.cmet.2015.07.021 (2015).
- 306 15 Shipman, P. & Walker, A. The costs of becoming a predator. *Journal of Human Evolution* **18**,  
307 373-392 (1989).
- 308 16 Nielsen, J. Systems Biology of Metabolism. *Annu Rev Biochem* **86**, 245-275,  
309 doi:10.1146/annurev-biochem-061516-044757 (2017).
- 310 17 Fang, X., Lloyd, C. J. & Palsson, B. O. Reconstructing organisms in silico: genome-scale models  
311 and their emerging applications. *Nat Rev Microbiol*, doi:10.1038/s41579-020-00440-4 (2020).
- 312 18 Edwards, J. S. & Palsson, B. O. The Escherichia coli MG1655 in silico metabolic genotype: its  
313 definition, characteristics, and capabilities. *Proc Natl Acad Sci U S A* **97**, 5528-5533,  
314 doi:10.1073/pnas.97.10.5528 (2000).
- 315 19 Forster, J., Famili, I., Fu, P., Palsson, B. O. & Nielsen, J. Genome-scale reconstruction of the  
316 Saccharomyces cerevisiae metabolic network. *Genome Res* **13**, 244-253,  
317 doi:10.1101/gr.234503 (2003).
- 318 20 Robinson, J. L. *et al.* An atlas of human metabolism. *Sci Signal* **13**,  
319 doi:10.1126/scisignal.aaz1482 (2020).
- 320 21 Wilman, H. *et al.* EltonTraits 1.0: Species-level foraging attributes of the world's birds and  
321 mammals: Ecological Archives E095-178. *Ecology* **95**, 2027-2027 (2014).
- 322 22 Froese, R. & Pauly, D. *FishBase (online)*. <[www.fishbase.org](http://www.fishbase.org)> (2021).
- 323 23 Boyle, N. R. & Morgan, J. A. Flux balance analysis of primary metabolism in Chlamydomonas  
324 reinhardtii. *BMC Syst Biol* **3**, 4, doi:10.1186/1752-0509-3-4 (2009).
- 325 24 Bordel, S., Agren, R. & Nielsen, J. Sampling the solution space in genome-scale metabolic  
326 networks reveals transcriptional regulation in key enzymes. *PLoS Comput Biol* **6**, e1000859,  
327 doi:10.1371/journal.pcbi.1000859 (2010).
- 328 25 Vaitla, B. *et al.* Predicting nutrient content of ray-finned fishes using phylogenetic  
329 information. *Nat Commun* **9**, 3742, doi:10.1038/s41467-018-06199-w (2018).
- 330 26 Food Surveys Research Group. *Food and Nutrient Database for Dietary Studies (online)*.  
331 <[https://www.ars.usda.gov/northeast-area/beltsville-md-bhnrc/beltsville-human-nutrition-](https://www.ars.usda.gov/northeast-area/beltsville-md-bhnrc/beltsville-human-nutrition-research-center/food-surveys-research-group/docs/fndds-download-databases/)  
332 [research-center/food-surveys-research-group/docs/fndds-download-databases/](https://www.ars.usda.gov/northeast-area/beltsville-md-bhnrc/beltsville-human-nutrition-research-center/food-surveys-research-group/docs/fndds-download-databases/)> (2021).
- 333 27 Lodish, H. F. *et al.* *Molecular Cell Biology*. (W.H. Freeman, 2000).
- 334 28 Birk, Y. The Bowman-Birk inhibitor. Trypsin- and chymotrypsin-inhibitor from soybeans. *Int J*  
335 *Pept Protein Res* **25**, 113-131, doi:10.1111/j.1399-3011.1985.tb02155.x (1985).
- 336 29 Gilani, G. S., Cockell, K. A. & Sepehr, E. Effects of antinutritional factors on protein  
337 digestibility and amino acid availability in foods. *J AOAC Int* **88**, 967-987 (2005).
- 338 30 Ronimus, R. S. & Morgan, H. W. Distribution and phylogenies of enzymes of the Embden-  
339 Meyerhof-Parnas pathway from archaea and hyperthermophilic bacteria support a  
340 gluconeogenic origin of metabolism. *Archaea* **1**, 199-221, doi:10.1155/2003/162593 (2003).

- 341 31 Verhees, C. H. *et al.* The unique features of glycolytic pathways in Archaea. *Biochem J* **375**,  
342 231-246, doi:10.1042/BJ20021472 (2003).
- 343 32 Court, S. J., Waclaw, B. & Allen, R. J. Lower glycolysis carries a higher flux than any  
344 biochemically possible alternative. *Nat Commun* **6**, 8427, doi:10.1038/ncomms9427 (2015).
- 345 33 Wang, H. *et al.* RAVEN 2.0: A versatile toolbox for metabolic network reconstruction and a  
346 case study on *Streptomyces coelicolor*. *PLoS Comput Biol* **14**, e1006541,  
347 doi:10.1371/journal.pcbi.1006541 (2018).
- 348 34 Yates, A. D. *et al.* Ensembl 2020. *Nucleic Acids Res* **48**, D682-D688, doi:10.1093/nar/gkz966  
349 (2020).
- 350 35 Myers, P. *et al.* *The Animal Diversity Web (online)*. , <<https://animaldiversity.org>> (2021).
- 351 36 Pauly, D. & Palomares, M.-L. Fishing down marine food web: it is far more pervasive than we  
352 thought. *Bulletin of marine science* **76**, 197-212 (2005).
- 353 37 Nicolson, S. W., Nepi, M. & Pacini, E. *Nectaries and Nectar*. (Springer Netherlands, 2007).
- 354 38 Gottsberger, G., Schrauwen, J. & Linskens, H. Amino acids and sugars in nectar, and their  
355 putative evolutionary significance. *Plant Systematics and Evolution* **145**, 55-77 (1984).
- 356 39 Finke, M. D. Complete nutrient content of four species of feeder insects. *Zoo Biol* **32**, 27-36,  
357 doi:10.1002/zoo.21012 (2013).
- 358 40 Kouřimská, L. & Adámková, A. Nutritional and sensory quality of edible insects. *NFS journal* **4**,  
359 22-26 (2016).
- 360 41 Onadeko, A., Egonmwan, R. & Salju, J. Edible amphibian species: local knowledge of their  
361 consumption in southwest Nigeria and their nutritional value. *West African journal of applied*  
362 *ecology* **19** (2011).
- 363 42 Schoch, C. L. *et al.* NCBI Taxonomy: a comprehensive update on curation, resources and  
364 tools. *Database (Oxford)* **2020**, doi:10.1093/database/baaa062 (2020).
- 365 43 Heirendt, L. *et al.* Creation and analysis of biochemical constraint-based models using the  
366 COBRA Toolbox v.3.0. *Nat Protoc* **14**, 639-702, doi:10.1038/s41596-018-0098-2 (2019).
- 367

## 368 Acknowledgements

369 This research was supported by funding from the Novo Nordisk Foundation (grant number  
370 NNF10CC1016517) and the Knut and Alice Wallenberg Foundation. Open access funding is provided  
371 by Chalmers University of Technology.

## 372 Author contributions

373 R.Y., H.W., and J.N. conceived the study. R.Y. and H.W. designed and performed the analyses. J.N.  
374 supervised the study. All authors wrote the manuscript.

## 375 Competing interests

376 The authors declare no competing interests related to this work.

## 377 Materials and Correspondence

378 Correspondence to Jens Nielsen (email: [nielsenj@chalmers.se](mailto:nielsenj@chalmers.se))

## 379 Supplementary information

380 Supplementary Table 1-2.

## 381 Figure legends

382 Figure 1. Animal trophic levels (TL) and nutrient composition of different diet types. **A**, two examples  
383 of food chains are shown to demonstrate the concept of TL. **B-C**, the composition of the three major  
384 dietary macronutrients (lipids, carbohydrates, and proteins) in different diet types of terrestrial (**B**)  
385 and aquatic (**C**) species, order by trophic level, is given in % (g/g wet weight). Diet types are as  
386 collated in EltonTraits (Wilman *et al*, 2014).

387 Figure 2. Dietary nutrient composition and maximum ATP production. **A-C**, dietary carbohydrates (**A**),  
388 proteins (**B**), and lipids (**C**) of 33 species (32 animals plus human), is given with respect to the species-  
389 specific TL. Terrestrial species are in orange and aquatic species are in blue. **D**, the maximum ATP  
390 production as simulated using species-specific GEMs and constrained to reflect 100 g of food intake.  
391 **E**, the metabolic subsystems wherein a high % of reactions show high correlation with TL in FBA and  
392 random sampling analyses. Subsystems related to carbohydrate metabolism, amino acid metabolism,  
393 and fatty acid metabolism are shown.

394 Figure 3. Select metabolic pathways with a high % of reactions showing high correlation with TL. The  
395 pathways of glycolysis (**A**), TCA cycle (**B**), and lysine degradation to acetyl-CoA (**C**) are shown.  
396 Reactions that have high correlation with TL are represented by solid lines, and the GEM reaction ID  
397 is given. Reactions that have low correlation with TL are represented by dotted lines. Key metabolites  
398 in each pathway are indicated. F1,6-bP, fructose 1,6-bisphosphate. DHAP, dihydroxyacetone  
399 phosphate. G3P, glyceraldehyde 3-phosphate. 1,3-bPG, 1,3-bisphosphoglycerate. 3PG, 3-  
400 Phosphoglycerate. 2PG, 2-Phosphoglycerate. PEP, phosphoenolpyruvate. OAA, oxaloacetate. CIT,  
401 citrate. Suc-CoA, succinyl-CoA. SUC, succinate. FUM, fumarate. MAL, malate.

402 Figure 4. ATP production is constrained by nucleotide metabolism. **A**, the nucleotide synthesis  
403 pathway from several precursors is shown. Reactions that have high correlation with TL are  
404 represented by solid lines. Key metabolites are indicated. Colors separate the main pathway (black)  
405 from the synthesis of different precursors. PRPP, phosphoribosyl pyrophosphate. GAR, 5'-  
406 phosphoribosylglycinamide. N-formyl-GAR, 5'-phosphoribosyl-N-formylglycinamide. AIR, 5'-  
407 phosphoribosyl-5-aminoimidazole. SAICAR, 1-(5'-phosphoribosyl)-5-amino-4-(N-  
408 succinocarboxamide)-imidazole. AICAR, 1-(5'-phosphoribosyl)-5-amino-4-(N-succinocarboxamide)-  
409 imidazole. IMP, inosine monophosphate. 10-formyl-THF, 10-formyltetrahydrofolate. **B**, the maximum

410 ATP production as simulated using species-specific GEMs and constrained to reflect 100 g of food  
411 intake, with 10% of the food allowed to be adenosine monophosphate (AMP).

412

Figure 1

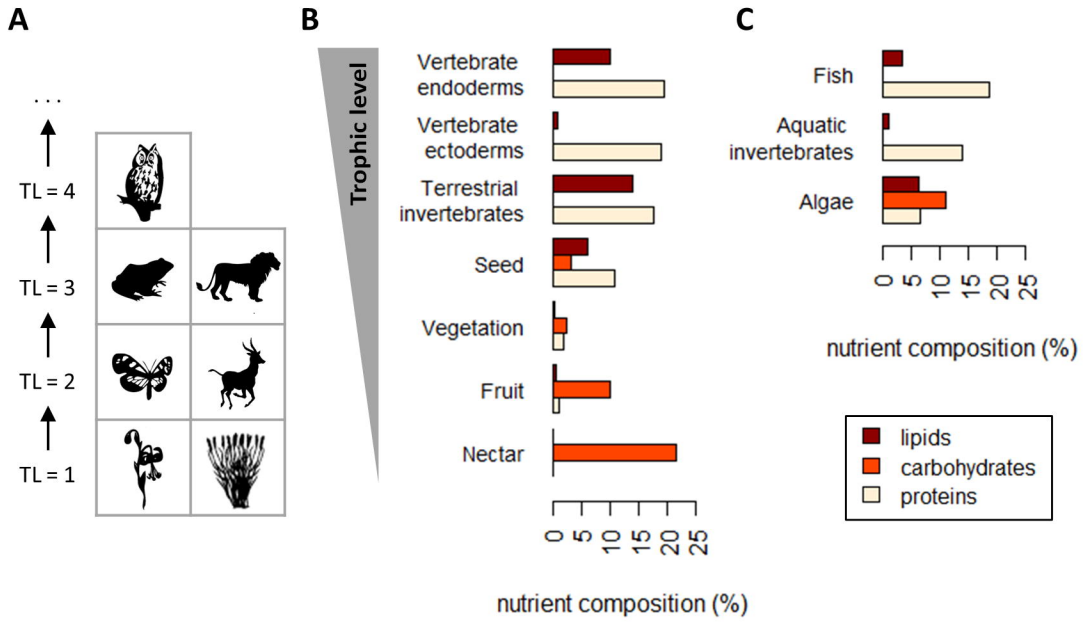

Figure 2

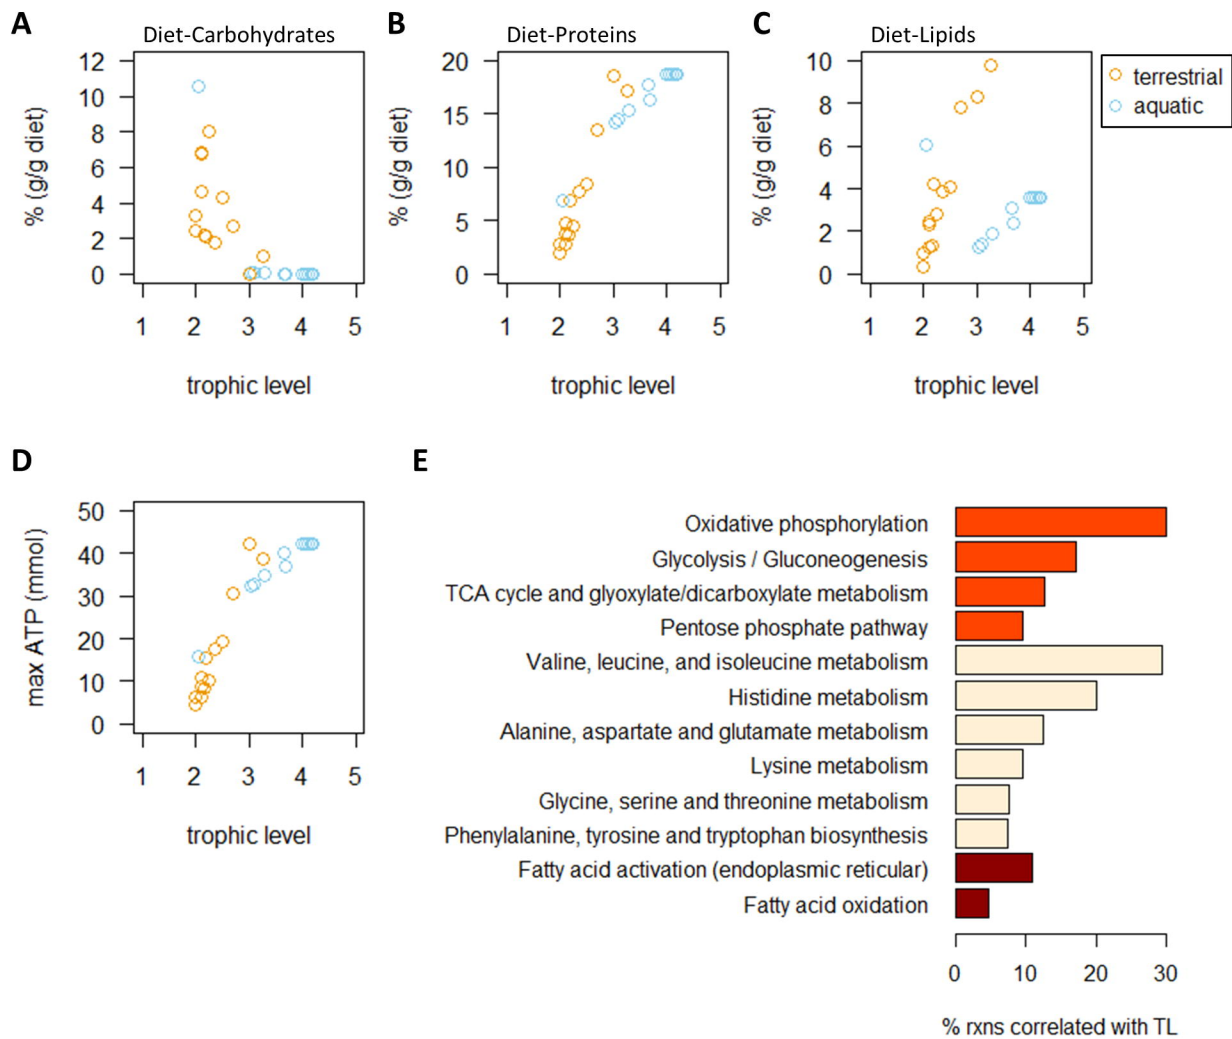



# Figure 3

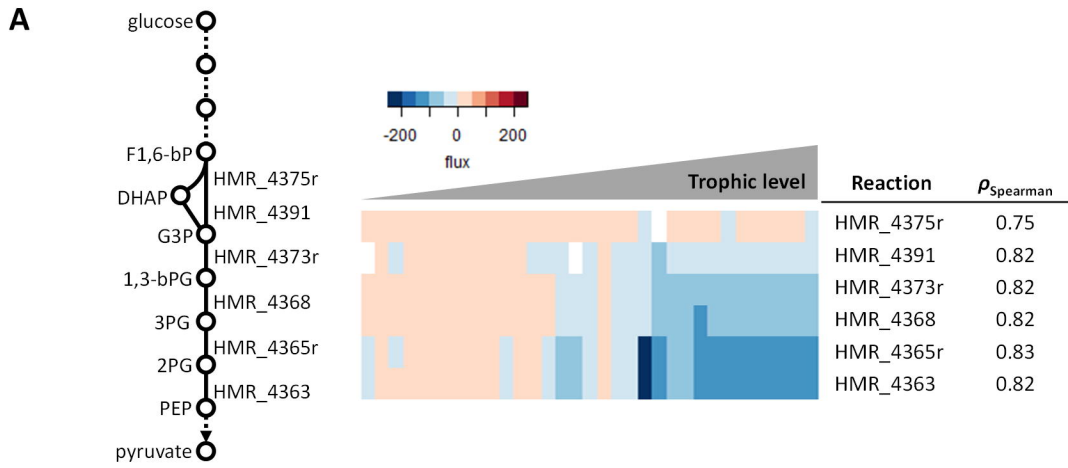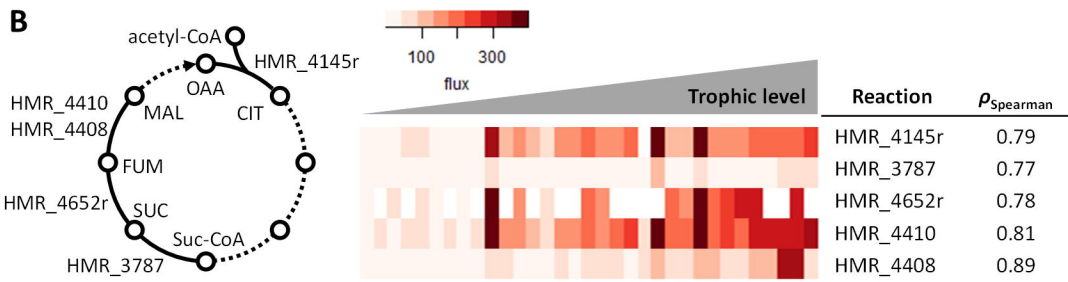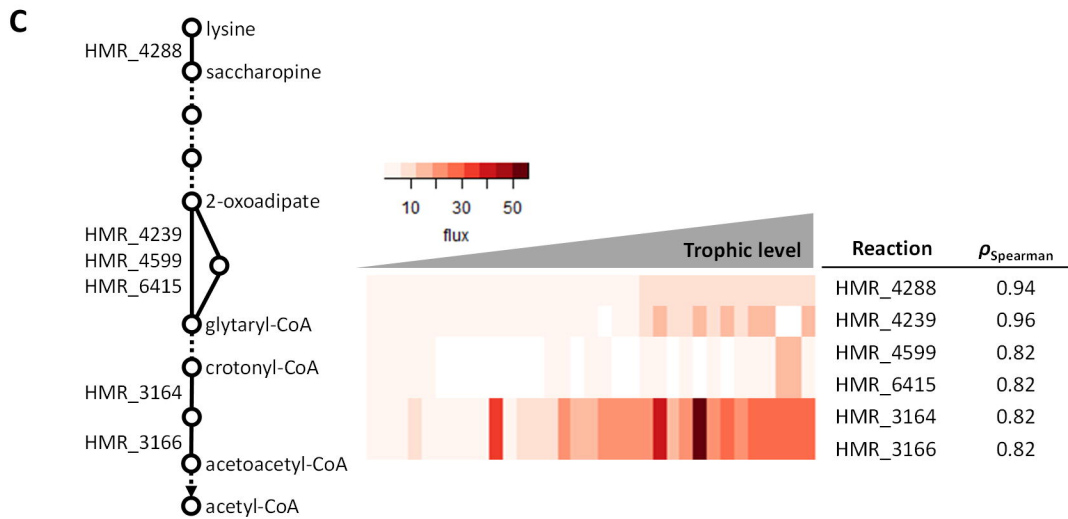

Figure 4

**A**

| Pathway                                    | $\rho_{\text{Spearman}}$ |
|--------------------------------------------|--------------------------|
| His $\rightarrow$ 10-formyl-THF            | 0.96                     |
| Thr $\rightarrow$ Gly $\rightarrow$ GAR    | 0.94                     |
| Asn $\rightarrow$ Asp $\rightarrow$ SAICAR | 0.85                     |
| PRPP $\rightarrow$ IMP                     | 0.96                     |

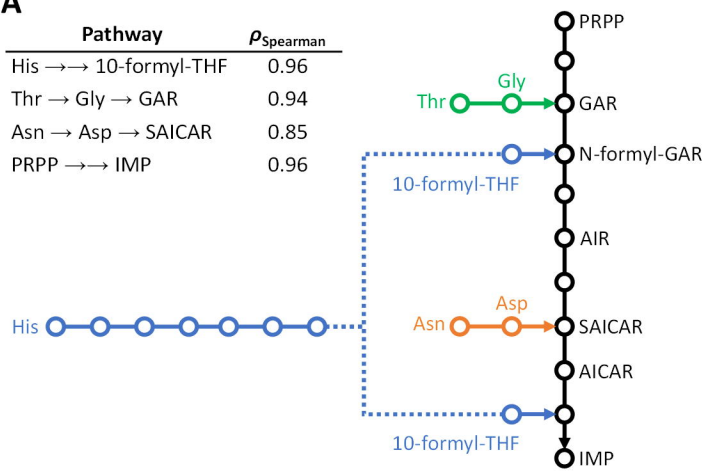

**B**

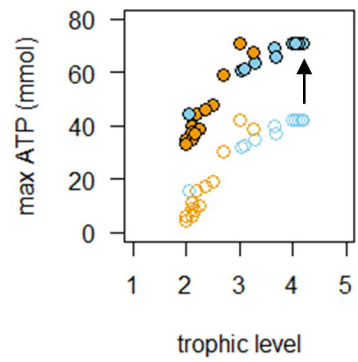

Source: http://biorxiv.org/content/10.1101/2021.07.01.450789v1.full.pdf
